# Supplementary material
Source: Springer Nature journal article supplement (https://www.springermedizin.de/resource/supplementary/13023_2009_178_MOESM4_ESM.pdf/9641798)

Survival

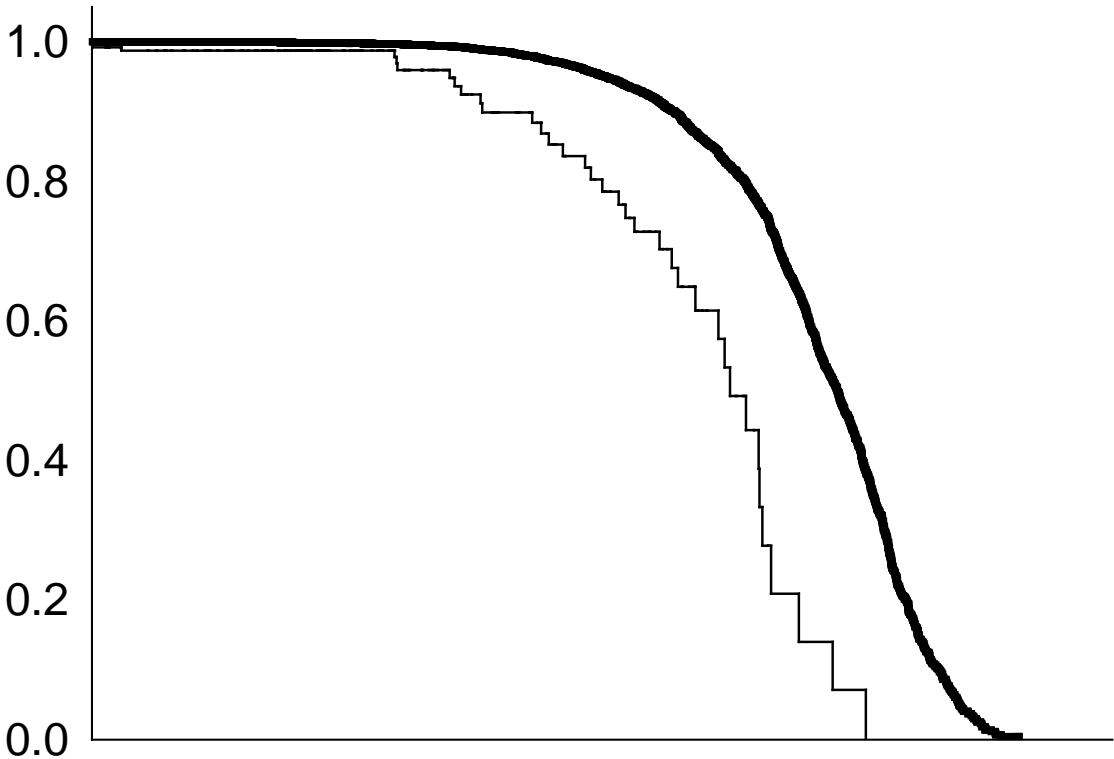

0 20 40 60 80 100

|          |        |        |       |       |     |   |
|----------|--------|--------|-------|-------|-----|---|
| Controls | 18.901 | 16.003 | 8.103 | 3.505 | 603 | 0 |
| Cases    | 208    | 162    | 74    | 30    | 2   | 0 |

Age

Supplement: MOESM4 [file 9641798]
